# Supplementary material for: Design, Synthesis, and Antileukemic Evaluation of a Novel Mikanolide Derivative Through the Ras/Raf/MEK/ERK Pathway
Source: Frontiers journal article supplement (doi:10.3389/fphar.2022.809551), 2022-05-20
Supplement: Data_Sheet_2.PDF [file Data_Sheet_2.PDF]

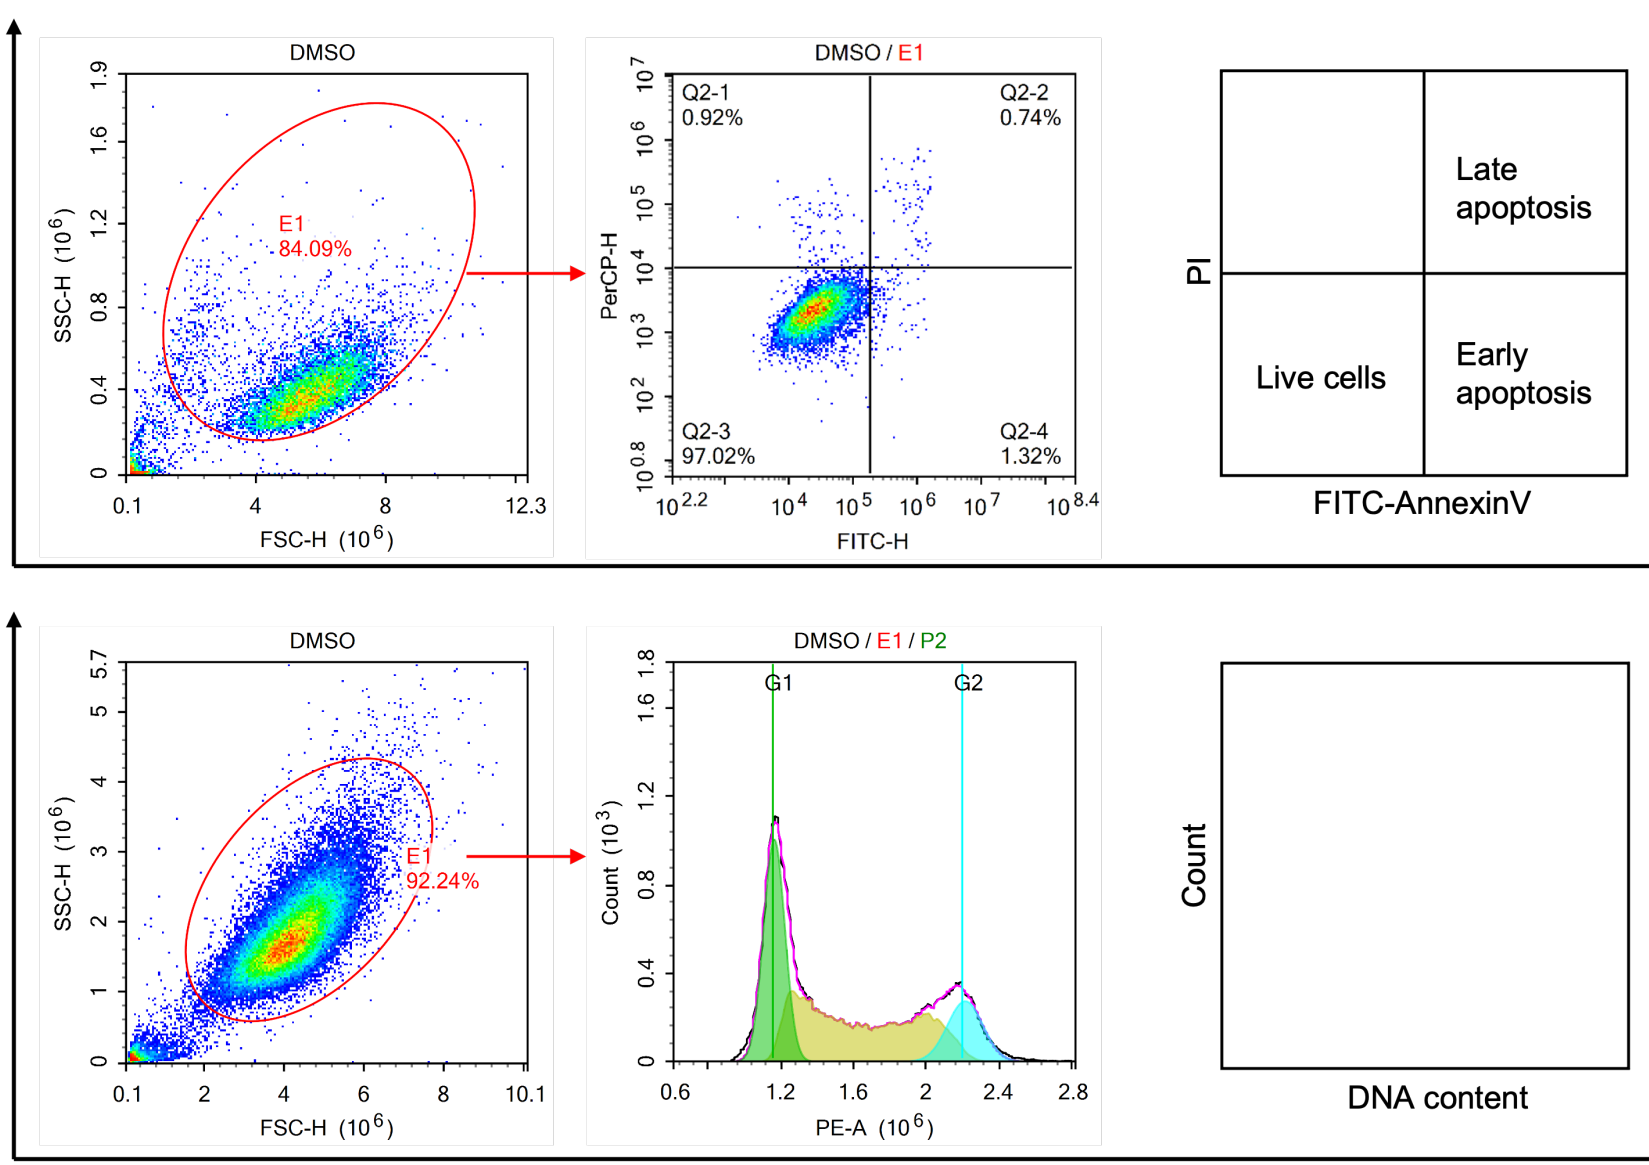

**Flow cytometry gating strategy. A.** Apoptosis analysis using FITC-AnnexinV/PI. Viable, late and early apoptotic fractions were identified using Annexin V. **B.** Cell cycle analysis using PI. The plot shows cells in G0/G1 phase (green), S phase (yellow) and G2/M phase (blue).
