# Supplementary material for: Design, Synthesis, and Antileukemic Evaluation of a Novel Mikanolide Derivative Through the Ras/Raf/MEK/ERK Pathway
Source: Front Pharmacol. 2022 May 20;13:809551. doi: 10.3389/fphar.2022.809551 (PMC9205396; doi:10.3389/fphar.2022.809551)
Supplement: Supplementary file 5 [file DataSheet3.XLSX]

## Sheet: CEM-C7H2
Figure 1B: CEM-C7H2
	Compound	Concentration(µM)	OD1	OD2	OD3				Inhibition rate	IC50-1		Concentration(µM)	OD1	OD2	OD3				Inhibition rate	IC50-2		Concentration(µM)	OD1	OD2	OD3				Inhibition rate	IC50-3	IC50-1	IC50-2	AV	SD
	Paclitaxel
		D	0.702	0.717	0.82	0.746333						D	0.69	0.763	0.823	0.758667						D	0.638	0.749	0.718	0.701667
		0.00125	0.627	0.638	0.581	0.615333	0.746333	0.131	0.175525	0.004		0.0025	0.462	0.479	0.535	0.492	0.758667	0.266667	0.351494	0.004		0.0025	0.552	0.565	0.629	0.582	0.701667	0.119667	0.170546	0.006	0.004	0.004	0.00466667	0.0011547
		0.0025	0.578	0.52	0.424	0.507333	0.746333	0.239	0.320232			0.005	0.34	0.319	0.303	0.320667	0.758667	0.438	0.577329			0.005	0.331	0.342	0.304	0.325667	0.701667	0.376	0.535867
		0.005	0.33	0.353	0.286	0.323	0.746333	0.423333	0.567218			0.01	0.212	0.216	0.204	0.210667	0.758667	0.548	0.72232			0.01	0.193	0.24	0.212	0.215	0.701667	0.486667	0.693587
	3b
		D	1.088	1.132	0.9	1.04						D	1.014	0.978	0.814	0.935333						D	0.971	0.986	0.797	0.918
		1	0.6	0.641	0.665	0.635333	1.04	0.404667	0.389103	1.558		1	0.756	0.742	0.853	0.783667	0.935333	0.151667	0.162153	2.068		1	0.666	0.554	0.588	0.602667	0.918	0.315333	0.3435	1.428	1.558	2.068	1.68467	0.33828
		3	0.373	0.399	0.338	0.37	1.04	0.67	0.644231			3	0.224	0.223	0.221	0.222667	0.935333	0.712667	0.761939			3	0.184	0.174	0.142	0.166667	0.918	0.751333	0.818446
		5	0.234	0.186	0.192	0.204	1.04	0.836	0.803846			5	0.193	0.184	0.191	0.189333	0.935333	0.746	0.797577			5	0.137	0.122	0.13	0.129667	0.918	0.788333	0.858751
	3c
		D	1.246	0.869	0.931	1.01533						D	1.133	1.116	1.118	1.12233						D	0.987	1.196	0.981	1.05467
		1	1.043	0.671	0.661	0.791667	1.01533	0.223667	0.220289	2.628		1	0.854	0.629	0.95	0.811	1.12233	0.311333	0.277398	3.19		1	0.669	0.75	0.711	0.71	1.05467	0.344667	0.326802	3.888	2.628	3.19	3.23533	0.631222
		3	0.517	0.478	0.481	0.492	1.01533	0.523333	0.51543			3	0.38	0.769	0.796	0.648333	1.12233	0.474	0.422334			3	0.594	0.595	0.699	0.629333	1.05467	0.425333	0.403287
		5	0.286	0.289	0.257	0.277333	1.01533	0.738	0.726855			5	0.204	0.526	0.466	0.398667	1.12233	0.723667	0.644788			5	0.345	0.436	0.557	0.446	1.05467	0.608667	0.577118
	3d
		D	1.015	0.853	0.609	0.825667						D	0.543	0.573	0.482	0.532667						D	0.785	0.743	0.886	0.804667
		1	0.185	0.183	0.183	0.183667	0.825667	0.642	0.777553	<1		0.15	0.388	0.365	0.506	0.419667	0.532667	0.113	0.21214	0.485		0.5	0.398	0.338	0.492	0.409333	0.804667	0.395333	0.491301	0.415		0.485	0.45	0.0494975
		3	0.152	0.115	0.116	0.127667	0.825667	0.698	0.845377			0.3	0.241	0.306	0.438	0.328333	0.532667	0.204333	0.383605			1	0.158	0.152	0.179	0.163	0.804667	0.641667	0.797432
		5	0.12	0.118	0.121	0.119667	0.825667	0.706	0.855067			0.5	0.245	0.275	0.277	0.265667	0.532667	0.267	0.501252			3	0.126	0.136	0.114	0.125333	0.804667	0.679333	0.844242
	3h
		D	0.648	0.911	0.596	0.718333						D	0.441	0.53	0.586	0.519						D	0.879	1.013	0.978	0.956667
		1	0.123	0.126	0.119	0.122667	0.718333	0.595667	0.829234	<5		0.15	0.295	0.304	0.382	0.327	0.519	0.192	0.369942	0.252		0.15	0.423	0.602	0.556	0.527	0.956667	0.429667	0.449129	0.185		0.252	0.2185	0.0473762
		3	0.124	0.109	0.12	0.117667	0.718333	0.600667	0.836195			0.3	0.257	0.238	0.283	0.259333	0.519	0.259667	0.500321			0.3	0.342	0.346	0.419	0.369	0.956667	0.587667	0.614286
		5	0.105	0.123	0.119	0.115667	0.718333	0.602667	0.838979			0.5	0.157	0.134	0.136	0.142333	0.519	0.376667	0.725755			0.5	0.165	0.156	0.156	0.159	0.956667	0.797667	0.833798
	3g
		D	0.72	0.699	0.948	0.789						D	0.507	0.602	0.552	0.553667						D	0.889	1.023	0.93	0.947333
		1	0.12	0.125	0.128	0.124333	0.789	0.664667	0.842417	<5		0.15	0.343	0.289	0.287	0.306333	0.553667	0.247333	0.446719	0.191		0.15	0.402	0.625	0.719	0.582	0.947333	0.365333	0.385644	0.188		0.191	0.1895	0.00212132
		3	0.108	0.119	0.119	0.115333	0.789	0.673667	0.853823			0.3	0.256	0.184	0.242	0.227333	0.553667	0.326333	0.589404			0.3	0.135	0.294	0.332	0.253667	0.947333	0.693667	0.732231
		5	0.107	0.123	0.11	0.113333	0.789	0.675667	0.856358			0.5	0.126	0.113	0.122	0.120333	0.553667	0.433333	0.782661			0.5	0.118	0.135	0.123	0.125333	0.947333	0.822	0.867699
	3a
		D	0.721	0.762	0.916	0.799667						D	0.568	0.581	0.637	0.595333						D	0.951	0.958	1.012	0.973667
		1	0.141	0.153	0.131	0.141667	0.799667	0.658	0.822843	<5		0.15	0.37	0.433	0.453	0.418667	0.595333	0.176667	0.296753	0.341		0.15	0.897	0.827	0.896	0.873333	0.973667	0.100333	0.103047	0.432		0.341	0.3865	0.0643467
		3	0.133	0.12	0.14	0.131	0.799667	0.668667	0.836182			0.3	0.341	0.296	0.315	0.317333	0.595333	0.278	0.466965			0.3	0.589	0.595	0.702	0.628667	0.973667	0.345	0.354331
		5	0.13	0.123	0.136	0.129667	0.799667	0.67	0.837849			0.5	0.23	0.242	0.245	0.239	0.595333	0.356333	0.598544			0.5	0.408	0.397	0.415	0.406667	0.973667	0.567	0.582335
	3f
		D	0.707	0.747	0.787	0.747						D	0.594	0.702	0.797	0.697667						D	0.88	1.183	0.972	1.01167
		1	0.298	0.284	0.247	0.276333	0.747	0.470667	0.630076	0.412		0.5	0.412	0.434	0.423	0.423	0.697667	0.274667	0.393693	0.712		0.5	0.464	0.602	0.479	0.515	1.01167	0.496667	0.490939	0.457	0.412	0.712	0.527	0.161787
		3	0.134	0.133	0.133	0.133333	0.747	0.613667	0.821508			1	0.295	0.266	0.259	0.273333	0.697667	0.424333	0.608218			1	0.197	0.219	0.228	0.214667	1.01167	0.797	0.787809
		5	0.139	0.132	0.149	0.14	0.747	0.607	0.812584			3	0.12	0.126	0.12	0.122	0.697667	0.575667	0.825131			3	0.119	0.12	0.096	0.111667	1.01167	0.9	0.889621
	3e
		D	0.669	0.69	0.695	0.684667						D	0.687	0.765	0.789	0.747						D	0.762	0.828	0.729	0.773
		1	0.568	0.648	0.582	0.599333	0.684667	0.0853333	0.124635	2.365		1	0.667	0.672	0.625	0.654667	0.747	0.0923333	0.123606	2.64		1	0.604	0.688	0.617	0.636333	0.773	0.136667	0.1768	3.045	2.365	2.64	2.68333	0.342065
		3	0.265	0.222	0.3	0.262333	0.684667	0.422333	0.616845			3	0.312	0.318	0.368	0.332667	0.747	0.414333	0.554663			3	0.391	0.394	0.382	0.389	0.773	0.384	0.496766
		5	0.092	0.092	0.097	0.0936667	0.684667	0.591	0.863194			5	0.141	0.158	0.162	0.153667	0.747	0.593333	0.794288			5	0.281	0.255	0.245	0.260333	0.773	0.512667	0.663217
	3i
		D	0.69	0.759	0.734	0.727667						D	1.344	1.258	1.45	1.35067						D	0.81	0.931	0.952	0.897667
		0.15	0.648	0.64	0.574	0.620667	0.727667	0.107	0.147045	0.336		0.15	1.127	1.155	1.088	1.12333	1.35067	0.227333	0.168312	0.362		0.15	0.764	0.762	0.816	0.780667	0.897667	0.117	0.130338	0.31	0.336	0.362	0.336	0.026
		0.3	0.403	0.403	0.386	0.397333	0.727667	0.330333	0.453962			0.3	0.772	0.748	0.751	0.757	1.35067	0.593667	0.439536			0.3	0.433	0.417	0.353	0.401	0.897667	0.496667	0.553286
		0.5	0.24	0.215	0.219	0.224667	0.727667	0.503	0.691251			0.5	0.512	0.533	0.475	0.506667	1.35067	0.844	0.624877			0.5	0.254	0.251	0.281	0.262	0.897667	0.635667	0.708132
	3r
		D	0.713	0.679	0.706	0.699333						D	1.538	1.325	1.603	1.48867						D	0.801	0.781	0.915	0.832333
		1	0.611	0.553	0.594	0.586	0.699333	0.113333	0.162059	4.23		1	1.186	1.178	1.478	1.28067	1.48867	0.208	0.139722	2.933		1	0.851	0.811	0.716	0.792667	0.832333	0.0396667	0.0476572	3.012	4.23	2.933	3.39167	0.727092
		3	0.43	0.416	0.455	0.433667	0.699333	0.265667	0.379886			3	0.666	0.587	0.725	0.659333	1.48867	0.829333	0.557098			3	0.356	0.291	0.296	0.314333	0.832333	0.518	0.622347
		5	0.299	0.277	0.341	0.305667	0.699333	0.393667	0.562917			5	0.442	0.488	0.563	0.497667	1.48867	0.991	0.665696			5	0.293	0.276	0.276	0.281667	0.832333	0.550667	0.661594
	3s
		D	0.698	0.688	0.703	0.696333						D	0.817	0.929	0.936	0.894						D	0.917	0.842	0.865	0.874667
		1	0.592	0.636	0.672	0.633333	0.696333	0.063	0.0904739	4.173		1	0.762	0.687	0.77	0.739667	0.894	0.154333	0.172632	2.231		1	0.713	0.804	0.887	0.801333	0.874667	0.0733333	0.0838415	2.925	4.173	2.231	3.10967	0.984082
		3	0.405	0.389	0.394	0.396	0.696333	0.300333	0.431307			3	0.265	0.249	0.232	0.248667	0.894	0.645333	0.721849			3	0.297	0.337	0.486	0.373333	0.874667	0.501333	0.573171
		5	0.347	0.307	0.324	0.326	0.696333	0.370333	0.531833			5	0.287	0.231	0.206	0.241333	0.894	0.652667	0.730052			5	0.275	0.245	0.253	0.257667	0.874667	0.617	0.705412
	3t
		D	0.719	0.625	0.592	0.645333						D	0.701	0.704	0.651	0.685333						D	0.758	0.755	0.762	0.758333
		1	0.596	0.631	0.593	0.606667	0.645333	0.0386667	0.0599174	4.239		1	0.519	0.564	0.529	0.537333	0.685333	0.148	0.215953	3.964		1	0.55	0.574	0.557	0.560333	0.758333	0.198	0.261099	2.45	4.239	3.964	3.551	0.963357
		3	0.482	0.562	0.419	0.487667	0.645333	0.157667	0.244318			3	0.477	0.559	0.376	0.470667	0.685333	0.214667	0.31323			3	0.322	0.328	0.315	0.321667	0.758333	0.436667	0.575824
		5	0.232	0.246	0.22	0.232667	0.645333	0.412667	0.639463			5	0.26	0.216	0.266	0.247333	0.685333	0.438	0.639105			5	0.241	0.268	0.224	0.244333	0.758333	0.514	0.677802
	3j
		D	0.622	0.637	0.589	0.616						D	0.57	0.59	0.565	0.575						D	0.882	0.875	0.874	0.877
		0.3	0.429	0.354	0.366	0.383	0.616	0.233	0.378247	0.407		0.3	0.401	0.388	0.342	0.377	0.575	0.198	0.344348	0.419		0.3	0.688	0.751	0.775	0.738	0.877	0.139	0.158495	0.661	0.407	0.419	0.495667	0.143309
		0.5	0.257	0.26	0.262	0.259667	0.616	0.356333	0.578463			0.5	0.233	0.249	0.21	0.230667	0.575	0.344333	0.598841			0.5	0.507	0.513	0.512	0.510667	0.877	0.366333	0.417712
		1	0.105	0.111	0.104	0.106667	0.616	0.509333	0.82684			1	0.139	0.088	0.091	0.106	0.575	0.469	0.815652			1	0.304	0.278	0.298	0.293333	0.877	0.583667	0.665526
	3k
		D	0.704	0.746	0.718	0.722667						D	0.787	0.811	0.745	0.781						D	0.792	0.813	0.757	0.787333
		0.15	0.554	0.58	0.535	0.556333	0.722667	0.166333	0.230166	0.238		0.15	0.632	0.676	0.661	0.656333	0.781	0.124667	0.159624	0.294		0.15	0.634	0.678	0.66	0.657333	0.787333	0.13	0.165114	0.288	0.238	0.294	0.273333	0.0307463
		0.3	0.395	0.147	0.171	0.237667	0.722667	0.485	0.671125			0.3	0.382	0.376	0.361	0.373	0.781	0.408	0.522407			0.3	0.381	0.367	0.373	0.373667	0.787333	0.413667	0.525402
		0.5	0.174	0.091	0.082	0.115667	0.722667	0.607	0.839945			0.5	0.176	0.197	0.148	0.173667	0.781	0.607333	0.777636			0.5	0.167	0.177	0.134	0.159333	0.787333	0.628	0.797629
	3q
		D	0.825	0.818	0.848	0.830333						D	0.912	0.793	0.711	0.805333						D	0.629	0.699	0.797	0.708333
		0.5	0.758	0.684	0.821	0.754333	0.830333	0.076	0.0915295	1.226		0.5	0.786	0.786	0.77	0.780667	0.805333	0.0246667	0.0306291	1.384		0.5	0.497	0.67	0.675	0.614	0.708333	0.0943333	0.133176	1.09	1.226	1.384	1.23333	0.147137
		1	0.479	0.422	0.484	0.461667	0.830333	0.368667	0.443998			1	0.6	0.421	0.454	0.491667	0.805333	0.313667	0.389487			1	0.251	0.303	0.314	0.289333	0.708333	0.419	0.591529
		3	0.106	0.12	0.135	0.120333	0.830333	0.71	0.855078			3	0.126	0.127	0.14	0.131	0.805333	0.674333	0.837334			3	0.141	0.136	0.154	0.143667	0.708333	0.564667	0.797176
	3p
		D	0.696	0.714	0.592	0.667333						D	1.268	1.49	1.322	1.36						D	0.844	0.728	0.806	0.792667
		0.15	0.477	0.4	0.349	0.408667	0.667333	0.258667	0.387612	0.293		0.15	0.698	0.799	0.678	0.725	1.36	0.635	0.466912	0.17		0.15	0.694	0.685	0.697	0.692	0.792667	0.100667	0.126997	0.378	0.293	0.17	0.280333	0.104577
		0.3	0.43	0.372	0.379	0.393667	0.667333	0.273667	0.41009			0.3	0.377	0.454	0.576	0.469	1.36	0.891	0.655147			0.3	0.558	0.548	0.583	0.563	0.792667	0.229667	0.289739
		0.5	0.232	0.226	0.186	0.214667	0.667333	0.452667	0.678322			0.5	0.167	0.358	0.329	0.284667	1.36	1.07533	0.790686			0.5	0.266	0.212	0.23	0.236	0.792667	0.556667	0.702271
	3u
		D	0.593	0.668	0.656	0.639						D	0.676	0.604	0.681	0.653667						D	1.097	1.185	1.088	1.12333
		0.15	0.364	0.467	0.461	0.430667	0.639	0.208333	0.32603	0.238		0.15	0.418	0.452	0.397	0.422333	0.653667	0.231333	0.353901	0.243		0.15	0.762	0.681	0.589	0.677333	1.12333	0.446	0.397033	0.225	0.238	0.243	0.235333	0.00929157
		0.3	0.247	0.282	0.311	0.28	0.639	0.359	0.561815			0.3	0.345	0.292	0.3	0.312333	0.653667	0.341333	0.522183			0.3	0.557	0.495	0.431	0.494333	1.12333	0.629	0.559941
		0.5	0.127	0.112	0.142	0.127	0.639	0.512	0.801252			0.5	0.191	0.135	0.123	0.149667	0.653667	0.504	0.771035			0.5	0.315	0.322	0.302	0.313	1.12333	0.810333	0.721365
	3n
		D	0.772	0.821	0.862	0.818333						D	0.709	0.795	0.944	0.816						D	1.232	1.311	1.351	1.298
		0.5	0.788	0.686	0.702	0.725333	0.818333	0.093	0.113646	0.93		0.5	0.665	0.859	0.876	0.8	0.816	0.016	0.0196078	1.052		0.5	0.854	0.79	0.927	0.857	1.298	0.441	0.339753	0.757	0.93	1.052	0.913	0.148233
		1	0.272	0.21	0.209	0.230333	0.818333	0.588	0.718534			1	0.212	0.262	0.276	0.25	0.816	0.566	0.693627			1	0.449	0.423	0.458	0.443333	1.298	0.854667	0.658449
		3	0.145	0.131	0.115	0.130333	0.818333	0.688	0.840733			3	0.131	0.133	0.154	0.139333	0.816	0.676667	0.829248			3	0.309	0.288	0.273	0.29	1.298	1.008	0.776579
	3m
		D	1.234	1.453	1.329	1.33867						D	0.74	0.712	0.699	0.717						D	0.805	0.789	0.798	0.797333
		0.3	0.642	0.769	0.635	0.682	1.33867	0.656667	0.490538	0.297		0.15	0.465	0.46	0.471	0.465333	0.717	0.251667	0.351	0.198		0.15	0.764	0.754	0.767	0.761667	0.797333	0.0356667	0.0447324	0.519	0.297	0.198	0.338	0.164381
		0.5	0.351	0.47	0.531	0.450667	1.33867	0.888	0.663347			0.3	0.195	0.182	0.211	0.196	0.717	0.521	0.726639			0.3	0.732	0.753	0.653	0.712667	0.797333	0.0846667	0.106187
		1	0.164	0.334	0.354	0.284	1.33867	1.05467	0.787849			0.5	0.092	0.091	0.1	0.0943333	0.717	0.622667	0.868433			0.5	0.361	0.425	0.407	0.397667	0.797333	0.399667	0.501254
	3l
		D	0.699	0.876	0.864	0.813						D	0.932	0.886	0.854	0.890667						D	1.12	1.037	0.92	1.02567
		0.5	0.682	0.605	0.798	0.695	0.813	0.118	0.145141	0.869		0.5	0.752	0.863	0.663	0.759333	0.890667	0.131333	0.147455	0.885		0.5	0.735	0.753	0.713	0.733667	1.02567	0.292	0.284693	1.122	0.869	0.885	0.958667	0.141677
		1	0.203	0.183	0.252	0.212667	0.813	0.600333	0.738417			1	0.291	0.276	0.223	0.263333	0.890667	0.627333	0.704341			1	0.69	0.642	0.305	0.545667	1.02567	0.48	0.467988
		3	0.115	0.119	0.112	0.115333	0.813	0.697667	0.858139			3	0.108	0.119	0.116	0.114333	0.890667	0.776333	0.871632			3	0.256	0.251	0.252	0.253	1.02567	0.772667	0.753331
	3o
		D	1.096	1.028	0.922	1.01533						D	0.962	1.061	1.04	1.021						D	0.901	0.877	0.923	0.900333
		0.3	0.58	0.612	0.574	0.588667	1.01533	0.426667	0.420223	0.337		0.3	0.886	0.978	0.946	0.936667	1.021	0.0843333	0.0825988	0.693		0.3	0.801	0.856	0.854	0.837	0.900333	0.0633333	0.0703443	0.701	0.693	0.337	0.577	0.207885
		0.5	0.38	0.307	0.24	0.309	1.01533	0.706333	0.695666			0.5	0.533	0.641	0.97	0.714667	1.021	0.306333	0.300033			0.5	0.656	0.648	0.526	0.61	0.900333	0.290333	0.322473
		1	0.129	0.127	0.122	0.126	1.01533	0.889333	0.875903			1	0.259	0.309	0.253	0.273667	1.021	0.747333	0.731962			1	0.311	0.239	0.247	0.265667	0.900333	0.634667	0.704924
	4
		D	0.587	0.654	0.64	0.627						D	0.741	0.748	0.768	0.752333						D	0.749	0.791	0.778	0.772667
		5	0.61	0.635	0.625	0.623333	0.627	0.00366667	0.00584795	>20		5	0.736	0.692	0.732	0.72	0.752333	0.0323333	0.0429774	>20		5	0.804	0.752	0.783	0.779667	0.772667	-0.007	-0.00905953	>20
		10	0.6	0.667	0.587	0.618	0.627	0.009	0.0143541			10	0.708	0.691	0.77	0.723	0.752333	0.0293333	0.0389898			10	0.767	0.818	0.797	0.794	0.772667	-0.0213333	-0.02761
		20	0.512	0.629	0.608	0.583	0.627	0.044	0.0701754			20	0.759	0.803	0.716	0.759333	0.752333	-0.007	-0.00930439			20	0.769	0.843	0.801	0.804333	0.772667	-0.0316667	-0.0409836
	1
		D	1.006	1.077	1.019	1.034						D	1.212	1.327	1.311	1.28333						D	0.775	0.743	0.718	0.745333
		0.3	0.498	0.547	0.538	0.527667	1.034	0.506333	0.489684	0.287		0.3	0.824	0.765	0.922	0.837	1.28333	0.446333	0.347792	0.402		0.3	0.629	0.632	0.365	0.542	0.745333	0.203333	0.272809	0.474	0.287	0.402	0.387667	0.0943204
		0.5	0.286	0.224	0.212	0.240667	1.034	0.793333	0.767247			0.5	0.438	0.441	0.457	0.445333	1.28333	0.838	0.652987			0.5	0.256	0.251	0.252	0.253	0.745333	0.492333	0.660555
		1	0.125	0.127	0.127	0.126333	1.034	0.907667	0.877821			1	0.301	0.286	0.273	0.286667	1.28333	0.996667	0.776623			1	0.259	0.235	0.257	0.250333	0.745333	0.495	0.664132
	2
		D	1.013	0.806	0.959	0.926						D	0.866	0.742	0.739	0.782333						D	0.962	1.061	1.04	1.021
		0.3	0.637	0.698	0.837	0.724	0.926	0.202	0.218143	0.735		0.3	0.741	0.685	0.637	0.687667	0.782333	0.0946667	0.121006	0.864		0.3	0.813	0.939	0.937	0.896333	1.021	0.124667	0.122103	0.661	0.735	0.864	0.753333	0.102734
		0.5	0.552	0.64	0.733	0.641667	0.926	0.284333	0.307055			0.5	0.592	0.538	0.481	0.537	0.782333	0.245333	0.313592			0.5	0.78	0.634	0.755	0.723	1.021	0.298	0.291871
		1	0.286	0.278	0.445	0.336333	0.926	0.589667	0.636789			1	0.343	0.35	0.372	0.355	0.782333	0.427333	0.546229			1	0.275	0.234	0.212	0.240333	1.021	0.780667	0.76461

## Sheet: HEL
Figure 1B: HEL
	Compound	Concentration(µM)	OD1	OD2	OD3				Inhibition rate	IC50-1		Concentration(µM)	OD1	OD2	OD3				Inhibition rate	IC50-2		Concentration(µM)	OD1	OD2	OD3				Inhibition rate	IC50-3	IC50-1	IC50-2	AV	SD
	Paclitaxel
		D	0.605	0.609	0.631	0.615						D	0.662	0.62	0.605	0.629						D	0.607	0.633	0.661	0.633667
		0.03	0.358	0.36	0.333	0.350333	0.615	0.264667	0.430352	0.067		0.03	0.346	0.353	0.352	0.350333	0.629	0.278667	0.443031	0.058		0.03	0.356	0.361	0.332	0.349667	0.633667	0.284	0.448185	0.056	0.067	0.058	0.0603333	0.00585947
		0.05	0.329	0.328	0.327	0.328	0.615	0.287	0.466667			0.05	0.346	0.285	0.286	0.305667	0.629	0.323333	0.514043			0.05	0.328	0.325	0.326	0.326333	0.633667	0.307333	0.485008
		0.1	0.291	0.28	0.278	0.283	0.615	0.332	0.539837			0.1	0.303	0.292	0.299	0.298	0.629	0.331	0.526232			0.1	0.283	0.3	0.263	0.282	0.633667	0.351667	0.554971
	3b
		D	1.997	1.601	1.642	1.74667						D	1.497	1.766	1.567	1.61						D	1.276	1.05	1.205	1.177
		1	1.016	1.418	1.46	1.298	1.74667	0.448667	0.25687	3.919		1	1.463	1.366	1.317	1.382	1.61	0.228	0.141615	2.611		1	0.87	0.844	0.768	0.827333	1.177	0.349667	0.297083	2.574	3.919	2.611	3.03467	0.766079
		3	1.005	0.951	1.213	1.05633	1.74667	0.690333	0.395229			3	0.969	0.881	0.821	0.890333	1.61	0.719667	0.446998			3	0.713	0.716	0.623	0.684	1.177	0.493	0.418862
		5	0.781	0.68	0.717	0.726	1.74667	1.02067	0.584351			5	0.167	0.143	0.144	0.151333	1.61	1.45867	0.906004			5	0.284	0.265	0.291	0.28	1.177	0.897	0.762107
	3c
		D	1.779	1.484	1.385	1.54933						D	1.266	1.318	1.142	1.242						D	1.372	1.461	1.481	1.438
		1	1.354	1.262	1.66	1.42533	1.54933	0.124	0.0800344	7.99		3	1.019	0.907	0.875	0.933667	1.242	0.308333	0.248256	6.184		3	1.629	1.225	1.096	1.31667	1.438	0.121333	0.0843764	9.652	7.99	6.184	7.942	1.7345
		3	1.254	1.216	1.559	1.343	1.54933	0.206333	0.133176			5	0.793	0.676	0.669	0.712667	1.242	0.529333	0.426194			5	1.146	1.284	1.19	1.20667	1.438	0.231333	0.160872
		5	1.07	0.815	0.915	0.933333	1.54933	0.616	0.39759			10	0.407	0.398	0.42	0.408333	1.242	0.833667	0.671229			10	0.552	0.684	0.547	0.594333	1.438	0.843667	0.586694
	3d
		D	1.359	2.005	1.083	1.48233						D	1.368	1.252	1.114	1.24467						D	1.462	1.548	1.602	1.53733
		1	0.7	0.557	0.868	0.708333	1.48233	0.774	0.52215	0.927		0.5	0.971	0.853	0.811	0.878333	1.24467	0.366333	0.294322	0.89		0.5	0.892	0.818	0.885	0.865	1.53733	0.672333	0.437337	0.553	0.927	0.89	0.79	0.20608
		3	0.132	0.095	0.108	0.111667	1.48233	1.37067	0.924668			1	0.482	0.486	0.659	0.542333	1.24467	0.702333	0.564274			1	0.384	0.378	0.43	0.397333	1.53733	1.14	0.741544
		5	0.108	0.108	0.105	0.107	1.48233	1.37533	0.927817			3	0.198	0.221	0.194	0.204333	1.24467	1.04033	0.835833			3	0.166	0.173	0.149	0.162667	1.53733	1.37467	0.894189
	3h
		D	1.333	1.31	1.605	1.416						D	1.221	1.149	0.939	1.103						D	1.727	1.459	1.496	1.56067
		1	0.394	0.34	0.384	0.372667	1.416	1.04333	0.736817	0.379		0.15	0.857	0.837	0.814	0.836	1.103	0.267	0.242067	0.317		0.15	1.417	1.091	0.99	1.166	1.56067	0.394667	0.252883	0.242	0.379	0.317	0.312667	0.0686027
		3	0.127	0.102	0.109	0.112667	1.416	1.30333	0.920433			0.3	0.507	0.579	0.483	0.523	1.103	0.58	0.525839			0.3	0.654	0.489	0.49	0.544333	1.56067	1.01633	0.651217
		5	0.102	0.091	0.094	0.0956667	1.416	1.32033	0.932439			0.5	0.371	0.486	0.378	0.411667	1.103	0.691333	0.626775			0.5	0.339	0.316	0.292	0.315667	1.56067	1.245	0.797736
	3g
		D	1.26	0.874	1.413	1.18233						D	1.125	1.007	0.959	1.03033						D	1.174	1.313	1.474	1.32033
		1	0.389	0.22	0.254	0.287667	1.18233	0.894667	0.756696	0.245		0.15	0.843	0.675	0.508	0.675333	1.03033	0.355	0.344549	0.263		0.15	0.888	0.803	1.018	0.903	1.32033	0.417333	0.316082	0.226	0.245	0.263	0.244667	0.0185023
		3	0.121	0.116	0.129	0.122	1.18233	1.06033	0.896814			0.3	0.491	0.454	0.418	0.454333	1.03033	0.576	0.559042			0.3	0.472	0.469	0.476	0.472333	1.32033	0.848	0.642262
		5	0.092	0.106	0.104	0.100667	1.18233	1.08167	0.914858			0.5	0.378	0.376	0.32	0.358	1.03033	0.672333	0.65254			0.5	0.257	0.25	0.295	0.267333	1.32033	1.053	0.797526
	3a
		D	1.39	1.205	1.435	1.34333						D	1.136	1.038	0.876	1.01667						D	1.003	1.124	1.276	1.13433
		0.5	0.556	0.509	0.779	0.614667	1.34333	0.728667	0.542432	0.355		0.5	0.609	0.517	0.477	0.534333	1.01667	0.482333	0.474426	0.568		0.5	0.645	0.826	0.777	0.749333	1.13433	0.385	0.339406	0.94	0.355	0.568	0.621	0.296079
		1	0.222	0.22	0.237	0.226333	1.34333	1.117	0.831514			1	0.41	0.341	0.453	0.401333	1.01667	0.615333	0.605246			1	0.433	0.545	0.515	0.497667	1.13433	0.636667	0.561269
		3	0.174	0.181	0.138	0.164333	1.34333	1.179	0.877667			3	0.219	0.249	0.236	0.234667	1.01667	0.782	0.76918			3	0.311	0.335	0.342	0.329333	1.13433	0.805	0.709668
	3f
		D	1.067	0.956	0.997	1.00667						D	2.089	1.515	1.412	1.672						D	1.655	1.696	1.745	1.69867
		0.5	0.953	0.95	0.99	0.964333	1.00667	0.0423333	0.042053	2.196		0.5	1.723	1.033	0.748	1.168	1.672	0.504	0.301435	0.873		0.5	1.358	1.442	1.358	1.386	1.69867	0.312667	0.184066	1.07	2.196	0.873	1.37967	0.713794
		1	0.66	0.706	0.727	0.697667	1.00667	0.309	0.306954			1	1.168	0.577	0.764	0.836333	1.672	0.835667	0.499801			1	0.785	0.675	0.681	0.713667	1.69867	0.985	0.579867
		3	0.431	0.405	0.409	0.415	1.00667	0.591667	0.587748			3	0.107	0.108	0.128	0.114333	1.672	1.55767	0.931619			3	0.393	0.38	0.361	0.378	1.69867	1.32067	0.777473
	3e
		D	1.049	1.195	1.176	1.14						D	1.25	1.14	0.983	1.12433						D	1.087	1.043	1.171	1.10033
		1	1.3	1.297	1.118	1.23833	1.14	-0.0983333	-0.0862573	6.323		3	0.903	0.76	0.723	0.795333	1.12433	0.329	0.292618	4.03		3	0.701	0.737	0.736	0.724667	1.10033	0.375667	0.341412	3.742	6.323	4.03	4.69833	1.41435
		3	0.856	1.009	1.038	0.967667	1.14	0.172333	0.15117			5	0.387	0.299	0.292	0.326	1.12433	0.798333	0.71005			5	0.317	0.278	0.296	0.297	1.10033	0.803333	0.730082
		5	0.599	0.571	0.62	0.596667	1.14	0.543333	0.476608			10	0.164	0.201	0.18	0.181667	1.12433	0.942667	0.838423			10	0.182	0.189	0.174	0.181667	1.10033	0.918667	0.834899
	3i
		D	1.075	0.991	1.126	1.064						D	1.343	1.268	1.235	1.282						D	1.499	1.268	1.519	1.42867
		1	0.372	0.274	0.304	0.316667	1.064	0.747333	0.702381	<1		0.3	1.045	0.809	1.201	1.01833	1.282	0.263667	0.205668	0.532		0.3	1.051	1.246	1.221	1.17267	1.42867	0.256	0.179188	0.503		0.532	0.5175	0.0205061
		3	0.27	0.241	0.252	0.254333	1.064	0.809667	0.760965			0.5	0.719	0.656	0.69	0.688333	1.282	0.593667	0.463079			0.5	0.664	0.631	0.691	0.662	1.42867	0.766667	0.536631
		5	0.253	0.237	0.238	0.242667	1.064	0.821333	0.77193			1	0.252	0.222	0.236	0.236667	1.282	1.04533	0.815393			1	0.237	0.215	0.22	0.224	1.42867	1.20467	0.84321
	3r
		D	1.104	1.122	0.981	1.069						D	1.264	1.231	1.246	1.247						D	1.213	1.288	1.297	1.266
		1	1.198	1.288	1.258	1.248	1.069	-0.179	-0.167446	>5		3	1.086	1.036	0.997	1.03967	1.247	0.207333	0.166266	4.93		3	0.794	0.996	1.135	0.975	1.266	0.291	0.229858	4.461		4.93	4.6955	0.331633
		3	1.044	0.858	0.869	0.923667	1.069	0.145333	0.135953			5	0.644	0.477	0.502	0.541	1.247	0.706	0.566159			5	0.459	0.448	0.504	0.470333	1.266	0.795667	0.628489
		5	0.676	0.591	0.614	0.627	1.069	0.442	0.413471			10	0.171	0.199	0.171	0.180333	1.247	1.06667	0.855386			10	0.166	0.145	0.184	0.165	1.266	1.101	0.869668
	3s
		D	1.264	1.296	1.272	1.27733						D	0.916	1.464	1.401	1.26033						D	1.539	1.262	1.674	1.49167
		1	1.245	1.269	1.213	1.24233	1.27733	0.035	0.0274008	5.848		3	1.157	1.221	1.268	1.21533	1.26033	0.045	0.0357048	5.49		3	1.135	1.211	1.302	1.216	1.49167	0.275667	0.184804	4.89	5.848	5.49	5.40933	0.484067
		3	1.051	0.915	0.936	0.967333	1.27733	0.31	0.242693			5	0.562	0.665	0.509	0.578667	1.26033	0.681667	0.540862			5	0.548	0.799	0.663	0.67	1.49167	0.821667	0.550838
		5	0.721	0.62	0.597	0.646	1.27733	0.631333	0.494259			10	0.199	0.233	0.172	0.201333	1.26033	1.059	0.840254			10	0.187	0.219	0.203	0.203	1.49167	1.28867	0.863911
	3t
		D	1.191	1.236	1.296	1.241						D	1.359	1.371	1.39	1.37333						D	1.438	1.361	1.411	1.40333
		1	1.19	1.135	1.236	1.187	1.241	0.054	0.0435133	9.583		5	0.714	1.074	0.839	0.875667	1.37333	0.497667	0.362379	7.069		5	0.922	1.062	0.924	0.969333	1.40333	0.434	0.309264	7.284	9.583	7.069	7.97867	1.39355
		3	0.984	0.961	1.005	0.983333	1.241	0.257667	0.207628			10	0.534	0.563	0.434	0.510333	1.37333	0.863	0.628398			10	0.378	0.482	0.484	0.448	1.40333	0.955333	0.68076
		5	0.878	0.905	0.88	0.887667	1.241	0.353333	0.284717			20	0.18	0.181	0.164	0.175	1.37333	1.19833	0.872573			20	0.165	0.196	0.184	0.181667	1.40333	1.22167	0.870546
	3j
		D	1.284	1.235	1.32	1.27967						D	1.266	1.228	1.769	1.421						D	1.179	1.232	1.361	1.25733
		1	0.57	0.398	0.354	0.440667	1.27967	0.839	0.655639	<1		0.3	1.214	1.117	1.105	1.14533	1.421	0.275667	0.193995	0.603		0.3	1.084	1.109	1.119	1.104	1.25733	0.153333	0.121951	0.627		0.603	0.615	0.0169706
		3	0.264	0.247	0.258	0.256333	1.27967	1.02333	0.799687			0.5	1.137	0.765	0.874	0.925333	1.421	0.495667	0.348815			0.5	0.773	0.761	0.763	0.765667	1.25733	0.491667	0.391039
		5	0.261	0.256	0.243	0.253333	1.27967	1.02633	0.802032			1	0.377	0.258	0.303	0.312667	1.421	1.10833	0.779967			1	0.271	0.298	0.376	0.315	1.25733	0.942333	0.74947
	3k
		D	0.95	0.899	0.791	0.88						D	1.231	1.34	1.275	1.282						D	1.242	1.295	1.493	1.34333
		1	0.249	0.252	0.242	0.247667	0.88	0.632333	0.718561	<1		0.3	0.941	0.833	0.917	0.897	1.282	0.385	0.300312	0.445		0.3	0.842	0.974	0.994	0.936667	1.34333	0.406667	0.30273	0.441		0.445	0.443	0.00282843
		3	0.23	0.225	0.225	0.226667	0.88	0.653333	0.742424			0.5	0.581	0.518	0.593	0.564	1.282	0.718	0.560062			0.5	0.529	0.604	0.632	0.588333	1.34333	0.755	0.562035
		5	0.217	0.178	0.194	0.196333	0.88	0.683667	0.776894			1	0.19	0.185	0.195	0.19	1.282	1.092	0.851794			1	0.175	0.182	0.19	0.182333	1.34333	1.161	0.864268
	3q
		D	0.796	0.868	0.782	0.815333						D	1.124	1.098	1.112	1.11133						D	0.812	0.887	0.89	0.863
		1	0.622	0.561	0.509	0.564	0.815333	0.251333	0.308258	1.949		1	0.656	0.598	0.553	0.602333	1.11133	0.509	0.458008	1.119		1	0.543	0.467	0.473	0.494333	0.863	0.368667	0.427192	1.29	1.949	1.119	1.45267	0.438258
		3	0.273	0.262	0.276	0.270333	0.815333	0.545	0.668438			3	0.274	0.265	0.254	0.264333	1.11133	0.847	0.762148			3	0.234	0.232	0.23	0.232	0.863	0.631	0.73117
		5	0.244	0.248	0.238	0.243333	0.815333	0.572	0.701554			5	0.267	0.263	0.271	0.267	1.11133	0.844333	0.759748			5	0.245	0.22	0.243	0.236	0.863	0.627	0.726535
	3p
		D	0.867	0.897	0.891	0.885						D	1.675	1.4	1.255	1.44333						D	1.323	1.49	1.443	1.41867
		1	0.226	0.222	0.237	0.228333	0.885	0.656667	0.741996	<1		0.15	1.34	0.839	0.886	1.02167	1.44333	0.421667	0.292148	0.201		0.15	0.785	0.918	1.156	0.953	1.41867	0.465667	0.328242	0.185		0.201	0.193	0.0113137
		3	0.194	0.202	0.216	0.204	0.885	0.681	0.769492			0.3	0.353	0.273	0.225	0.283667	1.44333	1.15967	0.803464			0.3	0.229	0.225	0.227	0.227	1.41867	1.19167	0.839991
		5	0.168	0.18	0.193	0.180333	0.885	0.704667	0.796234			0.5	0.18	0.181	0.169	0.176667	1.44333	1.26667	0.877598			0.5	0.164	0.176	0.187	0.175667	1.41867	1.243	0.876175
	3u
		D	1.117	1.13	1.154	1.13367						D	1.482	1.512	1.672	1.55533						D	1.304	1.243	1.342	1.29633
		1	0.266	0.265	0.277	0.269333	1.13367	0.864333	0.762423	<1		0.15	1.441	1.37	1.145	1.31867	1.55533	0.236667	0.152165	0.288		0.15	1.187	1.177	1.144	1.16933	1.29633	0.127	0.0979686	0.325		0.288	0.3065	0.026163
		3	0.255	0.25	0.268	0.257667	1.13367	0.876	0.772714			0.3	0.648	0.715	0.594	0.652333	1.55533	0.903	0.580583			0.3	0.639	0.647	0.713	0.666333	1.29633	0.63	0.485986
		5	0.226	0.208	0.219	0.217667	1.13367	0.916	0.807998			0.5	0.434	0.395	0.324	0.384333	1.55533	1.171	0.752893			0.5	0.316	0.324	0.392	0.344	1.29633	0.952333	0.734636
	3n
		D	1.135	1.106	1.12	1.12033						D	1.357	1.372	1.377	1.36867						D	1.488	1.41	1.417	1.43833
		1	0.643	0.588	0.573	0.601333	1.12033	0.519	0.463255	1.104		1	0.795	0.948	1.141	0.961333	1.36867	0.407333	0.297613	2.172		1	0.892	1.074	0.998	0.988	1.43833	0.450333	0.313094	2.178	1.104	2.172	1.818	0.618349
		3	0.283	0.282	0.266	0.277	1.12033	0.843333	0.752752			3	0.569	0.674	0.652	0.631667	1.36867	0.737	0.53848			3	0.743	0.771	0.745	0.753	1.43833	0.685333	0.476477
		5	0.271	0.274	0.273	0.272667	1.12033	0.847667	0.75662			5	0.363	0.293	0.265	0.307	1.36867	1.06167	0.775694			5	0.275	0.229	0.263	0.255667	1.43833	1.18267	0.822248
	3m
		D	1.118	1.177	1.228	1.17433						D	1.321	1.323	1.288	1.31067						D	1.147	1.187	1.382	1.23867
		1	0.259	0.256	0.272	0.262333	1.17433	0.912	0.776611	<1		0.15	1.167	0.804	1.137	1.036	1.31067	0.274667	0.209563	0.233		0.15	0.921	0.88	0.881	0.894	1.23867	0.344667	0.278256	0.227		0.233	0.23	0.00424264
		3	0.221	0.264	0.268	0.251	1.17433	0.923333	0.786262			0.3	0.444	0.345	0.34	0.376333	1.31067	0.934333	0.712869			0.3	0.39	0.383	0.475	0.416	1.23867	0.822667	0.664155
		5	0.19	0.202	0.196	0.196	1.17433	0.978333	0.833097			0.5	0.188	0.173	0.177	0.179333	1.31067	1.13133	0.863174			0.5	0.183	0.198	0.176	0.185667	1.23867	1.053	0.850108
	3l
		D	1.007	0.894	0.814	0.905						D	0.739	0.765	0.887	0.797						D	1.438	1.361	1.464	1.421
		1	0.603	0.462	0.358	0.474333	0.905	0.430667	0.475875	1.083		1	0.427	0.44	0.472	0.446333	0.797	0.350667	0.439983	1.237		1	1.155	0.998	1.17	1.10767	1.421	0.313333	0.220502	2.365	1.237	1.083	1.56167	0.699955
		3	0.361	0.263	0.202	0.275333	0.905	0.629667	0.695764			3	0.207	0.218	0.233	0.219333	0.797	0.577667	0.724801			3	0.675	0.589	0.623	0.629	1.421	0.792	0.557354
		5	0.304	0.268	0.222	0.264667	0.905	0.640333	0.707551			5	0.212	0.249	0.231	0.230667	0.797	0.566333	0.710581			5	0.366	0.263	0.297	0.308667	1.421	1.11233	0.782782
	3o
		D	0.818	0.879	0.889	0.862						D	0.96	0.822	0.891	0.891						D	1.44	1.39	1.759	1.52967
		1	0.514	0.487	0.475	0.492	0.862	0.37	0.429234	1.29		1	0.525	0.522	0.463	0.503333	0.891	0.387667	0.435092	1.269		1	1.04	0.805	1.212	1.019	1.52967	0.510667	0.333842	2.384	1.29	1.269	1.64767	0.63777
		3	0.242	0.235	0.234	0.237	0.862	0.625	0.725058			3	0.238	0.244	0.265	0.249	0.891	0.642	0.720539			3	0.875	0.795	0.879	0.849667	1.52967	0.68	0.444541
		5	0.247	0.228	0.233	0.236	0.862	0.626	0.726218			5	0.246	0.236	0.264	0.248667	0.891	0.642333	0.720913			5	0.431	0.314	0.398	0.381	1.52967	1.14867	0.750926
	4
		D	1.195	1.144	1.168	1.169						D	1.105	1.121	1.179	1.135						D	1.356	1.389	1.419	1.388
		1	1.081	1.202	1.186	1.15633	1.169	0.0126667	0.0108355	>5		3	1.15	1.141	1.179	1.15667	1.135	-0.0216667	-0.0190896	>10		5	1.359	1.371	1.39	1.37333	1.388	0.0146667	0.0105668	>20
		3	1.148	0.833	1.251	1.07733	1.169	0.0916667	0.0784146			5	1.173	1.205	0.988	1.122	1.135	0.013	0.0114537			10	1.386	1.404	1.465	1.41833	1.388	-0.0303333	-0.021854
		5	0.853	0.945	1.363	1.05367	1.169	0.115333	0.0986598			10	1.201	1.302	0.998	1.167	1.135	-0.032	-0.0281938			20	1.401	1.445	1.486	1.444	1.388	-0.056	-0.0403458
	1
		D	1.352	1.608	1.738	1.566						D	1.808	2.057	1.512	1.79233						D	1.681	1.356	1.529	1.522
		0.3	1.051	0.808	0.871	0.91	1.566	0.656	0.418902	0.443		0.3	0.754	1.274	1.53	1.186	1.79233	0.606333	0.338293	0.431		0.3	1.166	0.752	0.743	0.887	1.522	0.635	0.417214	0.403	0.443	0.431	0.425667	0.0205264
		0.5	0.884	0.843	0.758	0.828333	1.566	0.737667	0.471052			0.5	0.742	0.662	0.789	0.731	1.79233	1.06133	0.592152			0.5	0.672	0.732	0.608	0.670667	1.522	0.851333	0.559352
		1	0.442	0.352	0.317	0.370333	1.566	1.19567	0.763516			1	0.332	0.361	0.47	0.387667	1.79233	1.40467	0.783708			1	0.414	0.377	0.402	0.397667	1.522	1.12433	0.738721
	2
		D	1.768	1.942	1.744	1.818						D	1.771	1.873	1.892	1.84533						D	1.862	1.355	1.805	1.674
		0.5	1.475	1.508	1.394	1.459	1.818	0.359	0.19747	1.11		0.5	1.318	1.295	1.455	1.356	1.84533	0.489333	0.265173	1.183		0.5	1.485	1.494	1.404	1.461	1.674	0.213	0.12724	1.292	1.11	1.183	1.195	0.0915915
		1	0.763	1.045	1.126	0.978	1.818	0.84	0.462046			1	1.133	1.121	1.195	1.14967	1.84533	0.695667	0.376987			1	0.919	0.88	1.156	0.985	1.674	0.689	0.411589
		3	0.277	0.283	0.286	0.282	1.818	1.536	0.844884			3	0.345	0.33	0.349	0.341333	1.84533	1.504	0.815029			3	0.311	0.28	0.327	0.306	1.674	1.368	0.817204

## Sheet: K562
Figure 1B: K562
	Compound	Concentration(µM)	OD1	OD2	OD3				Inhibition rate	IC50-1	Concentration(µM)	OD1	OD2	OD3				Inhibition rate	IC50-2	Concentration(µM)	OD1	OD2	OD3				Inhibition rate	IC50-3	IC50-1	IC50-2	AV	SD
	Imatinib
		D	0.901	0.557	0.801	0.753					D	0.695	0.817	0.744	0.752					D	0.829	0.628	0.894	0.783667
		0.5	0.568	0.419	0.426	0.471	0.753	0.282	0.374502	1.558	0.5	0.432	0.462	0.375	0.423	0.752	0.329	0.4375	1.022	0.5	0.501	0.405	0.443	0.449667	0.783667	0.334	0.426202	1.248	1.558	1.022	1.276	0.269095
		1	0.417	0.346	0.344	0.369	0.753	0.384	0.50996		1	0.341	0.407	0.323	0.357	0.752	0.395	0.525266		1	0.432	0.461	0.373	0.422	0.783667	0.361667	0.461506
		3	0.386	0.308	0.351	0.348333	0.753	0.404667	0.537406		3	0.342	0.324	0.329	0.331667	0.752	0.420333	0.558954		3	0.351	0.327	0.29	0.322667	0.783667	0.461	0.58826
	3b	D	0.621	0.744	0.671	0.678667					D	0.736	0.809	0.836	0.793667					D	1.088	1.132	0.9	1.04
		10	0.272	0.261	0.245	0.259333	0.678667	0.419333	0.617878	7.163	3	0.62	0.683	0.621	0.641333	0.793667	0.152333	0.191936	5.631	10	0.234	0.186	0.192	0.204	1.04	0.836	0.803846	3.784	7.163	5.631	5.526	1.69195
		5	0.475	0.448	0.366	0.429667	0.678667	0.249	0.366896		5	0.392	0.393	0.386	0.390333	0.793667	0.403333	0.50819		5	0.373	0.399	0.338	0.37	1.04	0.67	0.644231
		3	0.518	0.551	0.481	0.516667	0.678667	0.162	0.238703		10	0.233	0.21	0.215	0.219333	0.793667	0.574333	0.723646		3	0.6	0.641	0.665	0.635333	1.04	0.404667	0.389103
	3c	D	0.658	0.669	0.726	0.684333					D	0.783	0.888	0.845	0.838667					D	0.637	0.419	0.62	0.558667
		3	0.555	0.599	0.571	0.575	0.684333	0.109333	0.159766	>10	5	0.785	0.889	0.897	0.857	0.838667	-0.0183333	-0.0218601	>20	5	0.512	0.372	0.461	0.448333	0.558667	0.110333	0.197494	>20
		5	0.515	0.458	0.523	0.498667	0.684333	0.185667	0.27131		10	0.648	0.744	0.755	0.715667	0.838667	0.123	0.146661		10	0.528	0.449	0.59	0.522333	0.558667	0.0363333	0.0650358
		10	0.427	0.419	0.494	0.446667	0.684333	0.237667	0.347297		20	0.494	0.47	0.557	0.507	0.838667	0.331667	0.395469		20	0.437	0.492	0.577	0.502	0.558667	0.0566667	0.101432
	3d	D	0.687	0.549	0.417	0.551					D	0.98	1.112	1.174	1.08867					D	1.246	0.869	0.931	1.01533
		5	0.302	0.249	0.2	0.250333	0.551	0.300667	0.545675	4.727	1	0.829	0.886	0.687	0.800667	1.08867	0.288	0.264544	3.214	5	0.286	0.289	0.257	0.277333	1.01533	0.738	0.726855	2.628	4.727	3.214	3.523	1.08308
		3	0.415	0.305	0.272	0.330667	0.551	0.220333	0.399879		3	0.646	0.825	0.437	0.636	1.08867	0.452667	0.415799		3	0.517	0.478	0.481	0.492	1.01533	0.523333	0.51543
		1	0.362	0.329	0.328	0.339667	0.551	0.211333	0.383545		5	0.362	0.422	0.353	0.379	1.08867	0.709667	0.651868		1	1.043	0.671	0.661	0.791667	1.01533	0.223667	0.220289
	3h	D	0.556	0.475	0.5	0.510333					D	0.974	0.868	0.795	0.879					D	1.997	1.601	1.642	1.74667
		5	0.248	0.21	0.185	0.214333	0.510333	0.296	0.580013	1.533	0.5	0.672	0.557	0.583	0.604	0.879	0.275	0.312856	1.332	3	0.781	0.68	0.717	0.726	1.74667	1.02067	0.584351	1.874	1.533	1.332	1.57967	0.273997
		3	0.211	0.229	0.224	0.221333	0.510333	0.289	0.566297		1	0.501	0.405	0.443	0.449667	0.879	0.429333	0.488434		1	1.005	0.951	1.213	1.05633	1.74667	0.690333	0.395229
		1	0.277	0.261	0.285	0.274333	0.510333	0.236	0.462443		3	0.342	0.324	0.329	0.331667	0.879	0.547333	0.622677		0.5	1.016	1.418	1.46	1.298	1.74667	0.448667	0.25687
	3g	D	0.525	0.663	0.659	0.615667					D	0.723	0.705	0.768	0.732					D	0.905	0.942	0.859	0.902
		0.5	0.339	0.295	0.3	0.311333	0.615667	0.304333	0.494315	0.482	0.5	0.381	0.324	0.377	0.360667	0.732	0.371333	0.507286	0.411	0.3	0.515	0.442	0.62	0.525667	0.902	0.376333	0.417221	0.398	0.482	0.411	0.430333	0.0452143
		1	0.273	0.29	0.239	0.267333	0.615667	0.348333	0.565782		1	0.18	0.212	0.221	0.204333	0.732	0.527667	0.720856		0.5	0.371	0.323	0.374	0.356	0.902	0.546	0.605322
		3	0.211	0.223	0.262	0.232	0.615667	0.383667	0.623173		3	0.141	0.135	0.144	0.14	0.732	0.592	0.808743		1	0.346	0.436	0.291	0.357667	0.902	0.544333	0.603474
	3a	D	0.938	0.848	0.774	0.853333					D	0.729	0.654	0.754	0.712333					D	1.266	1.318	1.142	1.242
		0.5	0.669	0.663	0.658	0.663333	0.853333	0.19	0.222656	1.473	1	0.438	0.431	0.539	0.469333	0.712333	0.243	0.341132	1.916	0.5	1.019	0.907	0.875	0.933667	1.242	0.308333	0.248256	1.434	1.473	1.916	1.60767	0.267736
		1	0.448	0.363	0.387	0.399333	0.853333	0.454	0.532031		3	0.347	0.291	0.287	0.308333	0.712333	0.404	0.56715		1	0.793	0.676	0.669	0.712667	1.242	0.529333	0.426194
		3	0.325	0.405	0.295	0.341667	0.853333	0.511667	0.599609		5	0.176	0.155	0.121	0.150667	0.712333	0.561667	0.788489		3	0.407	0.398	0.42	0.408333	1.242	0.833667	0.671229
	3f	D	0.802	0.858	0.801	0.820333					D	1.125	1.007	0.959	1.03033					D	1.067	0.956	0.997	1.00667
		0.5	0.861	0.894	0.789	0.848	0.820333	-0.0276667	-0.0337261	2.621	0.5	0.843	0.675	0.508	0.675333	1.03033	0.355	0.344549	1.014	0.5	0.953	0.95	0.99	0.964333	1.00667	0.0423333	0.042053	2.196	2.621	1.014	1.94367	0.832686
		1	0.631	0.682	0.734	0.682333	0.820333	0.138	0.168224		1	0.491	0.454	0.418	0.454333	1.03033	0.576	0.559042		1	0.66	0.706	0.727	0.697667	1.00667	0.309	0.306954
		3	0.295	0.458	0.347	0.366667	0.820333	0.453667	0.553027		3	0.378	0.376	0.32	0.358	1.03033	0.672333	0.65254		3	0.431	0.405	0.409	0.415	1.00667	0.591667	0.587748
	3e	D	0.501	0.707	0.879	0.695667					D	1.096	1.103	1.092	1.097					D	1.049	1.195	1.176	1.14
		1	0.6	0.588	0.861	0.683	0.695667	0.0126667	0.018208	6	1	1.102	1.165	0.966	1.07767	1.097	0.0193333	0.0176238	3.551	1	1.3	1.297	1.118	1.23833	1.14	-0.0983333	-0.0862573	6.323	6	3.551	5.29133	1.5158
		3	0.483	0.443	0.626	0.517333	0.695667	0.178333	0.256349		3	0.526	0.523	0.498	0.515667	1.097	0.581333	0.52993		3	0.856	1.009	1.038	0.967667	1.14	0.172333	0.15117
		5	0.354	0.338	0.402	0.364667	0.695667	0.331	0.475803		5	0.431	0.465	0.428	0.441333	1.097	0.655667	0.597691		5	0.599	0.571	0.62	0.596667	1.14	0.543333	0.476608
	3i	D	0.647	0.652	0.585	0.628					D	1.081	0.911	0.927	0.973					D	0.939	0.915	0.994	0.949333
		1	0.249	0.227	0.224	0.233333	0.628	0.394667	0.62845	0.61	0.3	0.684	0.564	0.789	0.679	0.973	0.294	0.302158	0.56	0.3	0.653	0.578	0.69	0.640333	0.949333	0.309	0.325492	0.56	0.56	0.61	0.576667	0.0288675
		3	0.217	0.217	0.212	0.215333	0.628	0.412667	0.657113		0.5	0.423	0.457	0.437	0.439	0.973	0.534	0.548818		0.5	0.443	0.466	0.422	0.443667	0.949333	0.505667	0.532654
		5	0.189	0.187	0.191	0.189	0.628	0.439	0.699045		1	0.361	0.378	0.4	0.379667	0.973	0.593333	0.609798		1	0.395	0.376	0.351	0.374	0.949333	0.575333	0.606039
	3r	D	1.213	1.288	1.017	1.17267					D	1.114	1.124	0.989	1.07567					D	1.264	1.231	1.246	1.247
		3	0.794	0.996	0.99	0.926667	1.17267	0.246	0.209778	4.538	1	1.198	1.288	1.258	1.248	1.07567	-0.172333	-0.160211	6.418	3	1.086	1.036	0.997	1.03967	1.247	0.207333	0.166266	4.93	4.538	6.418	5.29533	0.991817
		5	0.459	0.448	0.407	0.438	1.17267	0.734667	0.626492		3	1.044	0.858	0.869	0.923667	1.07567	0.152	0.141308		5	0.644	0.477	0.502	0.541	1.247	0.706	0.566159
		10	0.166	0.145	0.146	0.152333	1.17267	1.02033	0.870097		5	0.561	0.501	0.532	0.531333	1.07567	0.544333	0.506043		10	0.171	0.199	0.171	0.180333	1.247	1.06667	0.855386
	3s	D	0.689	0.657	0.877	0.741					D	1.113	0.988	1.091	1.064					D	1.264	1.296	1.272	1.27733
		1	0.629	0.616	0.841	0.695333	0.741	0.0456667	0.0616284	5.26	1	1.076	0.989	1.055	1.04	1.064	0.024	0.0225564	5.079	1	1.245	1.269	1.213	1.24233	1.27733	0.035	0.0274008	5.747	5.26	5.079	5.362	0.345484
		3	0.517	0.467	0.656	0.546667	0.741	0.194333	0.262258		3	0.852	0.719	0.755	0.775333	1.064	0.288667	0.271303		3	1.051	0.915	0.936	0.967333	1.27733	0.31	0.242693
		5	0.378	0.38	0.351	0.369667	0.741	0.371333	0.501125		5	0.456	0.501	0.461	0.472667	1.064	0.591333	0.555764		5	0.711	0.62	0.567	0.632667	1.27733	0.644667	0.504697
	3t	D	0.618	0.625	0.65	0.631					5	0.714	1.074	0.839	0.875667	1.37333	0.497667	0.362379	7.069	5	0.922	1.062	1.109	1.031	1.385	0.354	0.255596	7.681	11.449	7.069	8.733	2.37195
		1	0.617	0.578	0.615	0.603333	0.631	0.0276667	0.0438457	11.449	10	0.534	0.563	0.434	0.510333	1.37333	0.863	0.628398		10	0.378	0.482	0.433	0.431	1.385	0.954	0.688809
		3	0.527	0.52	0.524	0.523667	0.631	0.107333	0.1701		20	0.18	0.181	0.164	0.175	1.37333	1.19833	0.872573		20	0.165	0.196	0.184	0.181667	1.385	1.20333	0.868833
		5	0.453	0.475	0.477	0.468333	0.631	0.162667	0.257792		D	1.359	1.371	1.39	1.37333					D	1.438	1.361	1.356	1.385
	3j	D	0.642	0.606	0.629	0.625667					D	0.953	0.969	0.944	0.955333					D	0.878	0.937	0.923	0.912667
		1	0.308	0.261	0.26	0.276333	0.625667	0.349333	0.558338	0.56	0.3	0.894	0.924	0.77	0.862667	0.955333	0.0926667	0.0969993	0.705	0.3	0.652	0.73	0.773	0.718333	0.912667	0.194333	0.212929	0.657	0.56	0.705	0.640667	0.073867
		3	0.223	0.211	0.19	0.208	0.625667	0.417667	0.667555		0.5	0.445	0.48	0.45	0.458333	0.955333	0.497	0.520237		0.5	0.436	0.415	0.481	0.444	0.912667	0.468667	0.513514
		5	0.195	0.185	0.167	0.182333	0.625667	0.443333	0.708578		1	0.421	0.402	0.399	0.407333	0.955333	0.548	0.573622		1	0.386	0.353	0.39	0.376333	0.912667	0.536333	0.587655
	3k	D	0.943	0.713	0.759	0.805					D	0.974	0.982	1.009	0.988333					D	0.958	0.926	0.927	0.937
		1	0.239	0.228	0.235	0.234	0.805	0.571	0.709317	0.4	0.3	0.535	0.487	0.683	0.568333	0.988333	0.42	0.424958	0.415	0.3	0.577	0.591	0.577	0.581667	0.937	0.355333	0.379224	0.528	0.415	0.4	0.447667	0.0699738
		3	0.186	0.193	0.224	0.201	0.805	0.604	0.750311		0.5	0.4	0.406	0.441	0.415667	0.988333	0.572667	0.579427		0.5	0.445	0.408	0.436	0.429667	0.937	0.507333	0.541444
		5	0.195	0.193	0.198	0.195333	0.805	0.609667	0.75735		1	0.422	0.392	0.389	0.401	0.988333	0.587333	0.594266		1	0.413	0.389	0.374	0.392	0.937	0.545	0.581644
	3q	D	0.685	0.734	0.63	0.683					D	0.796	0.868	0.782	0.815333					D	1.133	1.107	1.13	1.12333
		1	0.503	0.411	0.456	0.456667	0.683	0.226333	0.331381	2.12	1	0.622	0.561	0.509	0.564	0.815333	0.251333	0.308258	1.949	1	0.623	0.525	0.537	0.561667	1.12333	0.561667	0.5	0.913	2.12	1.949	1.66067	0.653119
		3	0.278	0.233	0.249	0.253333	0.683	0.429667	0.629087		3	0.273	0.262	0.276	0.270333	0.815333	0.545	0.668438		3	0.236	0.215	0.264	0.238333	1.12333	0.885	0.787834
		5	0.25	0.275	0.232	0.252333	0.683	0.430667	0.630551		5	0.244	0.248	0.238	0.243333	0.815333	0.572	0.701554		5	0.263	0.265	0.271	0.266333	1.12333	0.857	0.762908
	3p	D	0.594	0.659	0.726	0.659667					D	0.862	0.875	0.85	0.862333					D	0.84	0.835	0.827	0.834
		1	0.215	0.186	0.193	0.198	0.659667	0.461667	0.699848	<1	0.15	0.509	0.456	0.447	0.470667	0.862333	0.391667	0.454194	0.213	0.15	0.383	0.426	0.422	0.410333	0.834	0.423667	0.507994	0.116		0.213	0.1645	0.0685894
		3	0.182	0.189	0.192	0.187667	0.659667	0.472	0.715513		0.3	0.381	0.371	0.355	0.369	0.862333	0.493333	0.572091		0.3	0.385	0.35	0.37	0.368333	0.834	0.465667	0.558353
		5	0.2	0.165	0.183	0.182667	0.659667	0.477	0.723092		0.5	0.403	0.396	0.4	0.399667	0.862333	0.462667	0.536529		0.5	0.38	0.345	0.361	0.362	0.834	0.472	0.565947
	3u	D	0.73	0.726	0.655	0.703667					D	1.062	0.929	0.881	0.957333					D	0.826	0.829	0.841	0.832
		1	0.23	0.235	0.239	0.234667	0.703667	0.469	0.666509	0.42	0.15	0.691	0.718	0.674	0.694333	0.957333	0.263	0.274721	0.314	0.15	0.557	0.651	0.51	0.572667	0.832	0.259333	0.311699	0.349	0.314	0.42	0.361	0.0540093
		3	0.215	0.216	0.22	0.217	0.703667	0.486667	0.691615		0.3	0.412	0.433	0.421	0.422	0.957333	0.535333	0.559192		0.3	0.404	0.425	0.402	0.410333	0.832	0.421667	0.506811
		5	0.182	0.178	0.179	0.179667	0.703667	0.524	0.744671		0.5	0.384	0.416	0.391	0.397	0.957333	0.560333	0.585306		0.5	0.381	0.395	0.339	0.371667	0.832	0.460333	0.553285
	3n	D	0.66	0.724	0.628	0.670667					D	1.135	1.106	1.12	1.12033					D	1.255	1.323	1.49	1.356
		1	0.381	0.346	0.384	0.370333	0.670667	0.300333	0.447813	1.304	1	0.643	0.588	0.573	0.601333	1.12033	0.519	0.463255	1.104	1	0.886	0.785	0.918	0.863	1.356	0.493	0.363569	1.351	1.304	1.104	1.253	0.13116
		3	0.227	0.232	0.225	0.228	0.670667	0.442667	0.66004		3	0.283	0.282	0.266	0.277	1.12033	0.843333	0.752752		3	0.225	0.229	0.225	0.226333	1.356	1.12967	0.833088
		5	0.187	0.195	0.189	0.190333	0.670667	0.480333	0.716203		5	0.271	0.274	0.273	0.272667	1.12033	0.847667	0.75662		5	0.169	0.164	0.176	0.169667	1.356	1.18633	0.874877
	3m	D	0.693	0.663	0.806	0.720667					D	0.905	0.964	0.924	0.931					D	0.998	0.953	0.944	0.965
		1	0.254	0.253	0.24	0.249	0.720667	0.471667	0.654487	<1	0.15	0.575	0.469	0.397	0.480333	0.931	0.450667	0.484067	0.168	0.15	0.434	0.576	0.574	0.528	0.965	0.437	0.45285	0.203	0.168	0.1855	0.0247487
		3	0.236	0.221	0.214	0.223667	0.720667	0.497	0.689639		0.3	0.383	0.421	0.406	0.403333	0.931	0.527667	0.566774		0.3	0.39	0.445	0.42	0.418333	0.965	0.546667	0.566494
		5	0.204	0.195	0.18	0.193	0.720667	0.527667	0.732192		0.5	0.356	0.399	0.385	0.38	0.931	0.551	0.591837		0.5	0.353	0.401	0.371	0.375	0.965	0.59	0.611399
	3l	D	0.795	0.842	0.878	0.838333					D	1.007	0.894	0.814	0.905					D	0.739	0.765	0.813	0.772333
		1	0.511	0.514	0.527	0.517333	0.838333	0.321	0.382903	1.762	1	0.603	0.462	0.358	0.474333	0.905	0.430667	0.475875	1.083	1	0.427	0.44	0.474	0.447	0.772333	0.325333	0.421234	1.346	1.762	1.083	1.397	0.342361
		3	0.259	0.332	0.327	0.306	0.838333	0.532333	0.63499		3	0.361	0.263	0.202	0.275333	0.905	0.629667	0.695764		3	0.207	0.218	0.231	0.218667	0.772333	0.553667	0.716875
		5	0.239	0.318	0.288	0.281667	0.838333	0.556667	0.664016		5	0.304	0.268	0.222	0.264667	0.905	0.640333	0.707551		5	0.212	0.249	0.235	0.232	0.772333	0.540333	0.699612
	3o	D	0.745	0.839	0.743	0.775667					D	0.818	0.879	0.889	0.862					D	0.96	0.822	0.895	0.892333
		1	0.478	0.375	0.373	0.408667	0.775667	0.367	0.473141	1.107	1	0.514	0.487	0.475	0.492	0.862	0.37	0.429234	1.29	1	0.525	0.522	0.6	0.549	0.892333	0.343333	0.384759	1.496	1.107	1.29	1.29767	0.194613
		3	0.229	0.311	0.233	0.257667	0.775667	0.518	0.667813		3	0.242	0.235	0.234	0.237	0.862	0.625	0.725058		3	0.238	0.244	0.261	0.247667	0.892333	0.644667	0.722451
		5	0.263	0.304	0.241	0.269333	0.775667	0.506333	0.652772		5	0.247	0.228	0.233	0.236	0.862	0.626	0.726218		5	0.246	0.236	0.266	0.249333	0.892333	0.643	0.720583
	4	D	0.72	0.808	0.734	0.754					D	1.195	1.144	1.168	1.169					D	1.105	1.121	1.179	1.135
		1	0.701	0.804	0.814	0.773	0.754	-0.019	-0.0251989	>5	5	1.081	1.202	1.186	1.15633	1.169	0.0126667	0.0108355	>20	5	1.15	1.141	1.179	1.15667	1.135	-0.0216667	-0.0190896	>20
		3	0.692	0.596	0.71	0.666	0.754	0.088	0.116711		10	1.148	0.833	1.251	1.07733	1.169	0.0916667	0.0784146		10	1.173	1.205	0.988	1.122	1.135	0.013	0.0114537
		5	0.66	0.584	0.67	0.638	0.754	0.116	0.153846		20	0.853	0.945	1.363	1.05367	1.169	0.115333	0.0986598		20	1.201	1.302	0.998	1.167	1.135	-0.032	-0.0281938
	1	D	0.638	0.833	0.695	0.722					D	0.801	0.692	0.729	0.740667					D	0.911	0.781	0.8	0.830667
		0.5	0.548	0.555	0.587	0.563333	0.722	0.158667	0.21976	0.887	0.5	0.54	0.497	0.65	0.562333	0.740667	0.178333	0.240774	0.965	0.5	0.709	0.709	0.775	0.731	0.830667	0.0996667	0.119984	1.373	0.887	0.965	1.075	0.261006
		1	0.276	0.217	0.233	0.242	0.722	0.48	0.66482		1	0.343	0.251	0.353	0.315667	0.740667	0.425	0.573807		1	0.427	0.373	0.434	0.411333	0.830667	0.419333	0.504815
		3	0.123	0.129	0.136	0.129333	0.722	0.592667	0.820868		3	0.134	0.141	0.136	0.137	0.740667	0.603667	0.815032		3	0.219	0.25	0.258	0.242333	0.830667	0.588333	0.708266
	2
		D	0.92	1.063	1.135	1.03933					D	1.08	1.072	1.135	1.09567					D	1.072	1.089	1.236	1.13233
		0.5	0.858	0.959	0.833	0.883333	1.03933	0.156	0.150096	1.701	0.5	0.691	0.66	0.641	0.664	1.09567	0.431667	0.393976	0.843	0.5	0.829	0.911	0.981	0.907	1.13233	0.225333	0.198999	1.318	1.701	0.843	1.28733	0.429821
		1	0.767	0.743	0.809	0.773	1.03933	0.266333	0.256254		1	0.567	0.563	0.62	0.583333	1.09567	0.512333	0.4676		1	0.68	0.734	0.674	0.696	1.13233	0.436333	0.38534
		3	0.277	0.281	0.286	0.281333	1.03933	0.758	0.729314		3	0.153	0.142	0.148	0.147667	1.09567	0.948	0.865227		3	0.273	0.246	0.235	0.251333	1.13233	0.881	0.778039

## Sheet: 7702
	3g: 7702
		D	0.813	0.822	0.905	0.846667						D	0.883	0.821	0.941	0.881667						D	0.861	0.846	0.794	0.833667
		5	0.684	0.69	0.737	0.703667	0.846667	0.143	0.168898	15.579		5	0.695	0.656	0.709	0.686667	0.881667	0.195	0.221172	21.172		5	0.638	0.607	0.702	0.649	0.833667	0.184667	0.221511	13.07	15.579	21.172	16.607	4.14767
		10	0.607	0.643	0.666	0.638667	0.846667	0.208	0.245669			10	0.804	0.786	0.657	0.749	0.881667	0.132667	0.150473			10	0.525	0.52	0.622	0.555667	0.833667	0.278	0.333467
		20	0.282	0.347	0.284	0.304333	0.846667	0.542333	0.640551			20	0.33	0.39	0.463	0.394333	0.881667	0.487333	0.552741			20	0.223	0.289	0.265	0.259	0.833667	0.574667	0.689324

## Sheet: IC50
	Figure 1B
	Cell	Compound	IC50-1	IC50-2	IC50-3	AV	SD			Cell	Compound	AV	SD		Cell	Compound	AV	SD		Cell	Compound	AV	SD
	K562	1	1.373	0.887	0.965	1.075	0.261006			K562	1	1.075	0.261006		HEL	1	0.425667	0.0205264		CEM-C7H2	1	0.387667	0.0943204
	K562	2	1.318	1.701	0.843	1.28733	0.429821			K562	2	1.28733	0.429821		HEL	2	1.195	0.0915915		CEM-C7H2	2	0.753333	0.102734
	K562	3a	1.434	1.473	1.916	1.60767	0.267736			K562	3a	1.60767	0.267736		HEL	3a	0.621	0.296079		CEM-C7H2	3a	0.3865	0.0643467
	K562	3b	3.784	7.163	5.631	5.526	1.69195			K562	3b	5.526	1.69195		HEL	3b	3.03467	0.766079		CEM-C7H2	3b	1.68467	0.33828
	K562	3c	>10	>20	>20					K562	3c	>20			HEL	3c	7.942	1.7345		CEM-C7H2	3c	3.23533	0.631222
	K562	3d	2.628	4.727	3.214	3.523	1.08308			K562	3d	3.523	1.08308		HEL	3d	0.79	0.20608		CEM-C7H2	3d	0.45	0.0494975
	K562	3e	6.323	6	3.551	5.29133	1.5158			K562	3e	5.29133	1.5158		HEL	3e	4.69833	1.41435		CEM-C7H2	3e	2.68333	0.342065
	K562	3f	2.196	2.621	1.014	1.94367	0.832686			K562	3f	1.94367	0.832686		HEL	3f	1.37967	0.713794		CEM-C7H2	3f	0.527	0.161787
	K562	3g	0.398	0.482	0.411	0.430333	0.0452143			K562	3g	0.430333	0.0452143		HEL	3g	0.244667	0.0185023		CEM-C7H2	3g	0.1895	0.00212132
	K562	3h	1.874	1.533	1.332	1.57967	0.273997			K562	3h	1.57967	0.273997		HEL	3h	0.312667	0.0686027		CEM-C7H2	3h	0.2185	0.0473762
	K562	3i	0.56	0.56	0.61	0.576667	0.0288675			K562	3i	0.576667	0.0288675		HEL	3i	0.5175	0.0205061		CEM-C7H2	3i	0.336	0.026
	K562	3j	0.657	0.56	0.705	0.640667	0.073867			K562	3j	0.640667	0.073867		HEL	3j	0.615	0.0169706		CEM-C7H2	3j	0.495667	0.143309
	K562	3k	0.528	0.415	0.4	0.447667	0.0699738			K562	3k	0.447667	0.0699738		HEL	3k	0.443	0.00282843		CEM-C7H2	3k	0.273333	0.0307463
	K562	3l	1.346	1.762	1.083	1.397	0.342361			K562	3l	1.397	0.342361		HEL	3l	1.56167	0.699955		CEM-C7H2	3l	0.958667	0.141677
	K562	3m	<1	0.203	0.168	0.1855	0.0247487			K562	3m	0.1855	0.0247487		HEL	3m	0.23	0.00424264		CEM-C7H2	3m	0.338	0.164381
	K562	3n	1.351	1.304	1.104	1.253	0.13116			K562	3n	1.253	0.13116		HEL	3n	1.818	0.618349		CEM-C7H2	3n	0.913	0.148233
	K562	3o	1.496	1.107	1.29	1.29767	0.194613			K562	3o	1.29767	0.194613		HEL	3o	1.64767	0.63777		CEM-C7H2	3o	0.577	0.207885
	K562	3p	<1	0.116	0.213	0.1645	0.0685894			K562	3p	0.1645	0.0685894		HEL	3p	0.193	0.0113137		CEM-C7H2	3p	0.280333	0.104577
	K562	3q	0.913	2.12	1.949	1.66067	0.653119			K562	3q	1.66067	0.653119		HEL	3q	1.45267	0.438258		CEM-C7H2	3q	1.23333	0.147137
	K562	3r	4.93	4.538	6.418	5.29533	0.991817			K562	3r	5.29533	0.991817		HEL	3r	4.6955	0.331633		CEM-C7H2	3r	3.39167	0.727092
	K562	3s	5.747	5.26	5.079	5.362	0.345484			K562	3s	5.362	0.345484		HEL	3s	5.40933	0.484067		CEM-C7H2	3s	3.10967	0.984082
	K562	3t	7.681	11.449	7.069	8.733	2.37195			K562	3t	8.733	2.37195		HEL	3t	7.97867	1.39355		CEM-C7H2	3t	3.551	0.963357
	K562	3u	0.349	0.314	0.42	0.361	0.0540093			K562	3u	0.361	0.0540093		HEL	3u	0.3065	0.026163		CEM-C7H2	3u	0.235333	0.00929157
	K562	4	>5	>20	>20					K562	4	>20			HEL	4	>20			CEM-C7H2	4	>20
	K562	Imatinib	1.248	1.558	1.022	1.276	0.269095			K562	Imatinib	1.276	0.269095		HEL	Paclitaxel	0.0603333	0.00585947		CEM-C7H2	Paclitaxel	0.00466667	0.0011547
	HEL	1	0.403	0.443	0.431	0.425667	0.0205264
	HEL	2	1.292	1.11	1.183	1.195	0.0915915
	HEL	3a	0.94	0.355	0.568	0.621	0.296079
	HEL	3b	2.574	3.919	2.611	3.03467	0.766079
	HEL	3c	9.652	7.99	6.184	7.942	1.7345
	HEL	3d	0.553	0.927	0.89	0.79	0.20608
	HEL	3e	3.742	6.323	4.03	4.69833	1.41435
	HEL	3f	1.07	2.196	0.873	1.37967	0.713794
	HEL	3g	0.226	0.245	0.263	0.244667	0.0185023
	HEL	3h	0.242	0.379	0.317	0.312667	0.0686027
	HEL	3i	<1	0.503	0.532	0.5175	0.0205061
	HEL	3j	<1	0.627	0.603	0.615	0.0169706
	HEL	3k	<1	0.441	0.445	0.443	0.00282843
	HEL	3l	2.365	1.237	1.083	1.56167	0.699955
	HEL	3m	<1	0.227	0.233	0.23	0.00424264
	HEL	3n	2.178	1.104	2.172	1.818	0.618349
	HEL	3o	2.384	1.29	1.269	1.64767	0.63777
	HEL	3p	<1	0.185	0.201	0.193	0.0113137
	HEL	3q	1.29	1.949	1.119	1.45267	0.438258
	HEL	3r	>5	4.461	4.93	4.6955	0.331633
	HEL	3s	4.89	5.848	5.49	5.40933	0.484067
	HEL	3t	7.284	9.583	7.069	7.97867	1.39355
	HEL	3u	<1	0.325	0.288	0.3065	0.026163
	HEL	4	>5	>10	>20
	HEL	Paclitaxel	0.056	0.067	0.058	0.0603333	0.00585947
	CEM-C7H2	1	0.474	0.287	0.402	0.387667	0.0943204
	CEM-C7H2	2	0.661	0.735	0.864	0.753333	0.102734
	CEM-C7H2	3a	<5	0.432	0.341	0.3865	0.0643467
	CEM-C7H2	3b	1.428	1.558	2.068	1.68467	0.33828
	CEM-C7H2	3c	3.888	2.628	3.19	3.23533	0.631222
	CEM-C7H2	3d	<1	0.415	0.485	0.45	0.0494975
	CEM-C7H2	3e	3.045	2.365	2.64	2.68333	0.342065
	CEM-C7H2	3f	0.457	0.412	0.712	0.527	0.161787
	CEM-C7H2	3g	<5	0.188	0.191	0.1895	0.00212132
	CEM-C7H2	3h	<5	0.185	0.252	0.2185	0.0473762
	CEM-C7H2	3i	0.31	0.336	0.362	0.336	0.026
	CEM-C7H2	3j	0.661	0.407	0.419	0.495667	0.143309
	CEM-C7H2	3k	0.288	0.238	0.294	0.273333	0.0307463
	CEM-C7H2	3l	1.122	0.869	0.885	0.958667	0.141677
	CEM-C7H2	3m	0.519	0.297	0.198	0.338	0.164381
	CEM-C7H2	3n	0.757	0.93	1.052	0.913	0.148233
	CEM-C7H2	3o	0.701	0.693	0.337	0.577	0.207885
	CEM-C7H2	3p	0.378	0.293	0.17	0.280333	0.104577
	CEM-C7H2	3q	1.09	1.226	1.384	1.23333	0.147137
	CEM-C7H2	3r	3.012	4.23	2.933	3.39167	0.727092
	CEM-C7H2	3s	2.925	4.173	2.231	3.10967	0.984082
	CEM-C7H2	3t	2.45	4.239	3.964	3.551	0.963357
	CEM-C7H2	3u	0.225	0.238	0.243	0.235333	0.00929157
	CEM-C7H2	4	>20	>20	>20
	CEM-C7H2	Paclitaxel	0.006	0.004	0.004	0.00466667	0.0011547
